# Supplementary material for: Identification of 3-((1-(Benzyl(2-hydroxy-2-phenylethyl)amino)-1-oxo-3-phenylpropan-2-yl)carbamoyl)pyrazine-2-carboxylic Acid as a Potential Inhibitor of Non-Nucleosidase Reverse Transcriptase Inhibitors through InSilico Ligand- and Structure-Based Approaches
Source: MDPI journal article supplement (doi:10.3390/molecules26175262), 2021-08-30
Supplement: s1 [file s1]

**Pharmacophore modeling, docking and virtual screening approaches in the discovery of  
novel Non-Nucleoside Reverse Transcriptase Inhibitors (NNRTI's)**

**Supporting Information Tables**

**Table S1.** Scores and data related to training set.

| <b>Name</b> | <b>IC<sub>50</sub><br/>(mM)<br/>Reported<sup>a</sup></b> | <b>IC<sub>50</sub> (mM)<br/>Estimated<sup>b</sup></b> | <b>Fit<br/>Value<sup>c</sup></b> | <b>Error</b> | <b>Activity<br/>Scale<br/>Est.<sup>d</sup></b> | <b>Observed<br/>Scale<br/>Rep.<sup>d</sup></b> | <b>HBA<br/>lipid<sup>e</sup></b> | <b>RA<sup>e</sup></b> | <b>HY<sup>e</sup></b> |
|-------------|----------------------------------------------------------|-------------------------------------------------------|----------------------------------|--------------|------------------------------------------------|------------------------------------------------|----------------------------------|-----------------------|-----------------------|
| <b>1</b>    | 0.008                                                    | 0.051                                                 | 10.73                            | -6.4         | ++                                             | +++                                            | 1                                | 1                     | 101                   |
| <b>7</b>    | 1.585                                                    | 0.16                                                  | 10.22                            | -9.7         | ++                                             | ++                                             | 1                                | 1                     | 101                   |
| <b>8</b>    | 3.98                                                     | 2.3                                                   | 9.07                             | -1.7         | ++                                             | ++                                             | 1                                | 1                     | 101                   |
| <b>20</b>   | 0.159                                                    | 0.39                                                  | 9.85                             | 2.5          | ++                                             | ++                                             | 0                                | 1                     | 101                   |
| <b>26</b>   | 0.398                                                    | 0.084                                                 | 10.51                            | -4.7         | +++                                            | ++                                             | 1                                | 0                     | 101                   |
| <b>27</b>   | 0.0004                                                   | 0.0009                                                | 13.45                            | 2.4          | ++                                             | +++                                            | 1                                | 1                     | 111                   |
| <b>40</b>   | 1.995                                                    | 0.18                                                  | 10.18                            | -11          | ++                                             | ++                                             | 1                                | 1                     | 101                   |
| <b>42</b>   | 1                                                        | 0.38                                                  | 9.85                             | -2.6         | ++                                             | ++                                             | 1                                | 0                     | 101                   |
| <b>43</b>   | 1.995                                                    | 0.13                                                  | 10.31                            | -15          | ++                                             | ++                                             | 1                                | 1                     | 111                   |
| <b>46</b>   | 0.398                                                    | 0.37                                                  | 9.87                             | -1.1         | ++                                             | ++                                             | 1                                | 1                     | 111                   |
| <b>54</b>   | 0.05                                                     | 0.2                                                   | 10.14                            | 4            | ++                                             | ++                                             | 1                                | 1                     | 101                   |
| <b>57</b>   | 0.003                                                    | 0.03                                                  | 10.96                            | 10           | +++                                            | +++                                            | 1                                | 0                     | 111                   |
| <b>60</b>   | 0.004                                                    | 0.0035                                                | 11.89                            | -1.1         | +++                                            | +++                                            | 1                                | 1                     | 111                   |
| <b>61</b>   | 0.001                                                    | 0.0018                                                | 12.18                            | -5.5         | +++                                            | +++                                            | 1                                | 1                     | 111                   |
| <b>63</b>   | 0.005                                                    | 0.003                                                 | 11.97                            | -1.7         | ++                                             | +++                                            | 1                                | 1                     | 101                   |
| <b>66</b>   | 0.05                                                     | 0.012                                                 | 11.43                            | -4.9         | ++                                             | ++                                             | 1                                | 1                     | 111                   |
| <b>67</b>   | 1.585                                                    | 0.3                                                   | 9.96                             | -5.3         | ++                                             | ++                                             | 1                                | 1                     | 111                   |
| <b>68</b>   | 1.258                                                    | 1                                                     | 9.43                             | -1.2         | ++                                             | ++                                             | 1                                | 1                     | 111                   |
| <b>76</b>   | 0.199                                                    | 0.16                                                  | 10.24                            | -1.3         | +                                              | ++                                             | 1                                | 1                     | 111                   |

|            |       |       |       |      |     |     |   |   |     |
|------------|-------|-------|-------|------|-----|-----|---|---|-----|
| <b>83</b>  | 100   | 36    | 6.97  | -2.8 | +   | +   | 1 | 1 | 101 |
| <b>86</b>  | 5.012 | 2.1   | 9.12  | -2.4 | +++ | ++  | 1 | 1 | 111 |
| <b>88</b>  | 0.003 | 0.01  | 10.42 | 3.2  | ++  | +++ | 1 | 1 | 111 |
| <b>92</b>  | 0.01  | 0.2   | 10.15 | 2.1  | +++ | +++ | 1 | 0 | 111 |
| <b>94</b>  | 0.02  | 0.13  | 10.34 | 6.3  | ++  | +++ | 1 | 1 | 111 |
| <b>95</b>  | 0.316 | 0.21  | 10.12 | -1.5 | ++  | ++  | 1 | 0 | 111 |
| <b>96</b>  | 0.079 | 0.17  | 10.22 | 2.1  | ++  | ++  | 1 | 1 | 111 |
| <b>97</b>  | 0.1   | 0.16  | 10.22 | 1.6  | ++  | ++  | 1 | 1 | 111 |
| <b>99</b>  | 0.02  | 0.041 | 10.82 | 2    | +++ | ++  | 1 | 1 | 111 |
| <b>102</b> | 0.158 | 0.12  | 10.35 | -1.3 | +++ | ++  | 1 | 1 | 101 |
| <b>103</b> | 0.032 | 0.14  | 10.28 | 4.5  |     | ++  | 1 | 1 | 111 |

<sup>a</sup> Reported activity, <sup>b</sup> Estimated Activity, <sup>c</sup> Ligand pharmacophore mapping based fit value, <sup>d</sup>Activity Scale HA (highly active, +++, 0.0004-0.01), MA (moderately active, ++, 0.01-5) and LA (least active, +, 5-100) according to their reported and estimated biological activity. <sup>e</sup> Feature Mapping based on Ligand pharmacophore mapping HBA, RA, HY.

**Table S2.** Test set prediction on training set pharmacophore.

| Name | IC <sub>50</sub> (nM)<br>Reported <sup>a</sup> | IC <sub>50</sub> (nM)<br>Estimated <sup>b</sup> | Fit<br>Value <sup>c</sup> | Activity<br>Scale <sup>d</sup> | Observed<br>Scale <sup>d</sup> | Mapped Features <sup>e</sup> |    |     |
|------|------------------------------------------------|-------------------------------------------------|---------------------------|--------------------------------|--------------------------------|------------------------------|----|-----|
|      |                                                |                                                 |                           | cat <sup>i</sup>               | obs <sup>ii</sup>              | HBA                          | RA | HY  |
| 2    | 0.004                                          | 0.031                                           | 6.866                     | ++                             | +++                            | 1                            | 1  | 111 |
| 3    | 0.025                                          | 0.0099                                          | 7.146                     | +++                            | ++                             | 1                            | 1  | 111 |
| 4    | 0.002                                          | 0.0005                                          | 8.415                     | +++                            | +++                            | 1                            | 1  | 111 |
| 5    | 0.316                                          | 0.04                                            | 8.851                     | +++                            | ++                             | 1                            | 1  | 111 |
| 6    | 0.01                                           | 0.0004                                          | 8.561                     | +++                            | +++                            | 1                            | 1  | 111 |
| 9    | 0.006                                          | 0.0098                                          | 7.149                     | +++                            | +++                            | 1                            | 1  | 111 |
| 10   | 0.006                                          | 0.0051                                          | 7.429                     | +++                            | +++                            | 1                            | 1  | 111 |
| 11   | 0.002                                          | 0.0168                                          | 6.914                     | ++                             | +++                            | 1                            | 1  | 111 |
| 12   | 0.005                                          | 0.0008                                          | 8.257                     | +++                            | +++                            | 1                            | 1  | 111 |
| 13   | 0.004                                          | 0.001                                           | 8.16                      | +++                            | +++                            | 1                            | 1  | 111 |
| 14   | 0.199                                          | 0.0002                                          | 8.76                      | +++                            | ++                             | 1                            | 1  | 111 |
| 15   | 1.585                                          | 0.5                                             | 8.752                     | ++                             | ++                             | 1                            | 1  | 111 |
| 16   | 0.004                                          | 0.003                                           | 7.662                     | +++                            | +++                            | 1                            | 1  | 111 |
| 17   | 0.013                                          | 0.0066                                          | 7.323                     | +++                            | ++                             | 1                            | 1  | 111 |
| 18   | 1.259                                          | 0.305                                           | 8.681                     | +++                            | ++                             | 1                            | 1  | 111 |
| 19   | 0.1                                            | 0.0005                                          | 8.464                     | +++                            | ++                             | 1                            | 1  | 111 |
| 21   | 0.04                                           | 0.0002                                          | 8.816                     | +++                            | ++                             | 1                            | 1  | 111 |
| 24   | 0.013                                          | 0.0004                                          | 8.592                     | +++                            | ++                             | 1                            | 1  | 111 |
| 25   | 0.008                                          | 0.0005                                          | 8.426                     | +++                            | +++                            | 1                            | 1  | 111 |
| 28   | 0.002                                          | 0.0005                                          | 8.468                     | +++                            | +++                            | 1                            | 1  | 111 |
| 29   | 0.002                                          | 0.001                                           | 8.162                     | +++                            | +++                            | 1                            | 1  | 111 |

|           |       |        |        |     |     |   |   |     |
|-----------|-------|--------|--------|-----|-----|---|---|-----|
| <b>30</b> | 0.002 | 0.0103 | 7.126  | +++ | +++ | 1 | 1 | 111 |
| <b>32</b> | 0.002 | 0.09   | 6.467  | ++  | +++ | 1 | 1 | 111 |
| <b>31</b> | 0.002 | 0.0043 | 7.51   | +++ | +++ | 1 | 1 | 111 |
| <b>33</b> | 0.004 | 0.0004 | 8.516  | +++ | +++ | 1 | 1 | 111 |
| <b>34</b> | 0.002 | 0.0006 | 8.352  | +++ | +++ | 1 | 1 | 111 |
| <b>35</b> | 0.05  | 0.0495 | 6.446  | ++  | ++  | 1 | 1 | 111 |
| <b>36</b> | 0.003 | 0.0006 | 8.367  | +++ | +++ | 1 | 1 | 111 |
| <b>37</b> | 0.079 | 0.0005 | 8.41   | +++ | ++  | 1 | 1 | 111 |
| <b>38</b> | 0.398 | 0.088  | 8.519  | +++ | ++  | 1 | 1 | 111 |
| <b>39</b> | 0.012 | 0.0084 | 7.215  | +++ | ++  | 1 | 1 | 111 |
| <b>41</b> | 0.126 | 0.0044 | 7.496  | +++ | ++  | 1 | 1 | 111 |
| <b>46</b> | 0.398 | 0.025  | 8.593  | +++ | ++  | 1 | 1 | 111 |
| <b>47</b> | 0.398 | 0.176  | 7.579  | +++ | ++  | 1 | 1 | 111 |
| <b>53</b> | 0.008 | 0.0035 | 7.599  | +++ | +++ | 1 | 1 | 111 |
| <b>56</b> | 0.001 | 0.0021 | 7.809  | +++ | +++ | 1 | 1 | 111 |
| <b>49</b> | 0.063 | 0.0377 | 6.4095 | ++  | ++  | 1 | 1 | 101 |
| <b>54</b> | 0.05  | 0.0007 | 8.3    | +++ | ++  | 1 | 1 | 111 |
| <b>44</b> | 0.04  | 0.1    | 6.932  | ++  | ++  | 1 | 1 | 101 |
| <b>50</b> | 0.251 | 0.247  | 6.7159 | ++  | ++  | 1 | 1 | 111 |
| <b>55</b> | 0.01  | 0.0033 | 7.625  | +++ | +++ | 1 | 1 | 111 |
| <b>58</b> | 0.039 | 0.0019 | 7.861  | +++ | ++  | 1 | 1 | 111 |
| <b>45</b> | 0.079 | 0.045  | 6.4    | ++  | ++  | 1 | 1 | 101 |
| <b>51</b> | 0.006 | 0.06   | 6.7159 | +++ | ++  | 1 | 1 | 111 |
| <b>52</b> | 0.158 | 0.0055 | 8.3653 | +++ | ++  | 1 | 1 | 111 |
| <b>62</b> | 0.003 | 0.0003 | 8.719  | +++ | +++ | 1 | 1 | 111 |
| <b>64</b> | 0.002 | 0.0028 | 7.687  | +++ | +++ | 1 | 1 | 111 |
| <b>65</b> | 0.005 | 0.0015 | 7.956  | +++ | +++ | 1 | 1 | 111 |

|            |       |        |       |     |     |   |   |     |
|------------|-------|--------|-------|-----|-----|---|---|-----|
| <b>67</b>  | 1.585 | 0.251  | 5.449 | ++  | ++  | 1 | 1 | 111 |
| <b>71</b>  | 0.079 | 0.0044 | 7.498 | +++ | ++  | 1 | 1 | 111 |
| <b>72</b>  | 0.079 | 0.0014 | 7.991 | +++ | ++  | 1 | 1 | 111 |
| <b>73</b>  | 0.001 | 0.0009 | 8.175 | +++ | +++ | 1 | 1 | 111 |
| <b>74</b>  | 0.012 | 0.0042 | 7.519 | +++ | ++  | 1 | 1 | 111 |
| <b>75</b>  | 0.158 | 0.0007 | 8.267 | +++ | ++  | 1 | 1 | 111 |
| <b>76</b>  | 1     | 0.239  | 7.956 | +++ | ++  | 1 | 1 | 111 |
| <b>77</b>  | 0.199 | 0.022  | 7.651 | +++ | ++  | 1 | 1 | 111 |
| <b>78</b>  | 0.063 | 0.0034 | 7.608 | +++ | ++  | 1 | 1 | 111 |
| <b>79</b>  | 0.001 | 0.0011 | 8.113 | +++ | +++ | 1 | 1 | 111 |
| <b>80</b>  | 0.006 | 0.0012 | 8.069 | +++ | +++ | 1 | 1 | 111 |
| <b>81</b>  | 0.003 | 0.0015 | 7.956 | +++ | +++ | 1 | 1 | 111 |
| <b>82</b>  | 0.008 | 0.0012 | 8.069 | +++ | +++ | 1 | 1 | 111 |
| <b>84</b>  | 0.063 | 0.049  | 6.829 | ++  | ++  | 1 | 1 | 111 |
| <b>85</b>  | 0.039 | 0.0005 | 8.48  | +++ | ++  | 1 | 1 | 111 |
| <b>86</b>  | 0.015 | 0.015  | 7.435 | ++  | ++  | 1 | 1 | 111 |
| <b>88</b>  | 0.016 | 0.0353 | 6.592 | ++  | ++  | 1 | 1 | 111 |
| <b>90</b>  | 0.01  | 0.0003 | 8.626 | +++ | +++ | 1 | 1 | 111 |
| <b>91</b>  | 0.003 | 0.0006 | 8.329 | +++ | +++ | 1 | 1 | 111 |
| <b>92</b>  | 0.061 | 0.003  | 7.669 | +++ | ++  | 1 | 1 | 111 |
| <b>94</b>  | 0.199 | 0.0022 | 7.792 | +++ | ++  | 1 | 1 | 111 |
| <b>99</b>  | 0.063 | 0.003  | 7.662 | +++ | ++  | 1 | 1 | 111 |
| <b>101</b> | 0.079 | 0.0005 | 8.486 | +++ | ++  | 1 | 1 | 111 |

<sup>a</sup> Reported activity, <sup>b</sup> Estimated Activity, <sup>c</sup> Ligand pharmacophore mapping based fit value, <sup>d</sup> Activity Scale HA (highly active, +++, 0.0004-0.01), MA (moderately active, ++, 0.01-5) and LA (least active, +, 5-100) according to their reported biological activity (<sup>i</sup> Estimated scale by catalyst software, <sup>ii</sup> Reported scale). <sup>e</sup> Feature Mapping based on Ligand pharmacophore mapping.

**Table S3.** Mapping of standard compounds and estimated activities using hypothesis 1.

| Comp.       | Fit Value | Estimated IC <sub>50</sub> in (μM) | Reported IC <sub>50</sub> in (μM) |
|-------------|-----------|------------------------------------|-----------------------------------|
| Delavirdine | 7.34      | 0.058                              | 0.0161                            |
| DPC083      | 7.13      | 0.062                              | 0.0004                            |
| HETP-1      | 6.06      | 1.117                              | 5.06                              |
| Nevirapine  | 6.22      | 0.759                              | 0.18                              |
| Efavirenz   | 7.35      | 0.057                              | 0.004                             |
| TMC125      | 6.34      | 0.515                              | 0.0014                            |
| L697.661    | 7.90      | 0.016                              | 0.23                              |
| GW8248      | 7.47      | 0.043                              | 0.0046                            |

**Figure S1.** The ligand pharmacophore mapping of the external test set of compounds on the pharmacophore model.

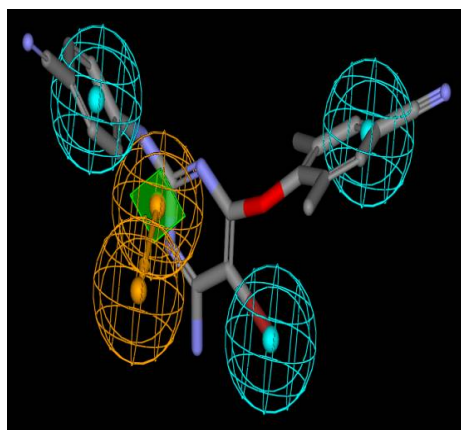

**a.** Mapping of TMC-125 on Hypo-1.

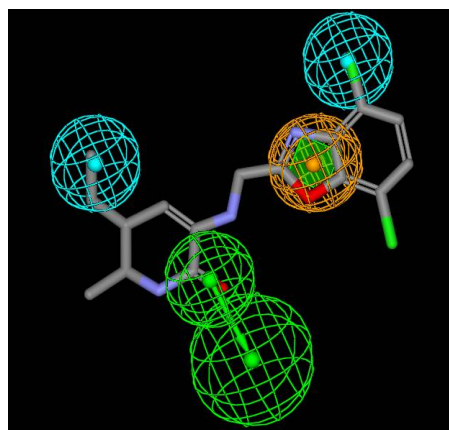

**b.** Mapping of L697,661 on Hypo-1.

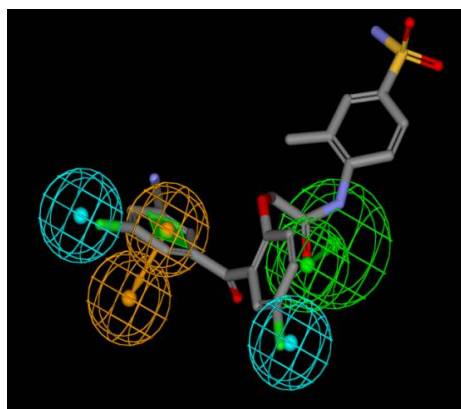

**c.** Mapping of GW8248 on Hypo- 1.

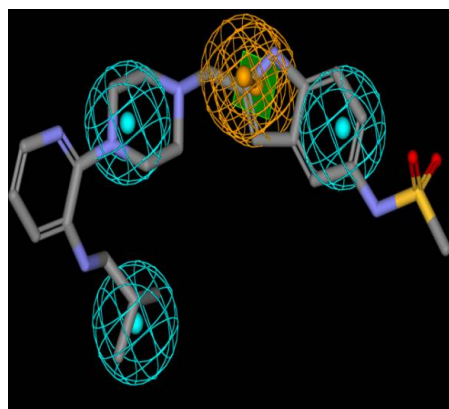

**d.** Mapping of Delavirdine on Hypo- 1.

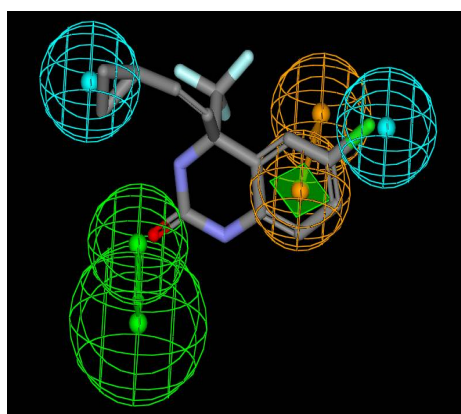

**e.** Mapping of DPC083 on Hypo- 1.

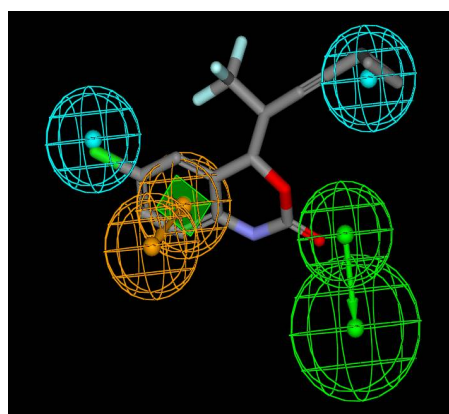

**f.** Mapping of Efavirenz on Hypo- 1.
